# Supplementary material for: Famine Exposure in Early Life and Risk of Metabolic Syndrome in Adulthood: Comparisons of Different Metabolic Syndrome Definitions
Source: Hindawi journal article supplement (doi:10.1155/2019/7954856), 2019-12-06
Supplement: f1 [file 7954856.f1.pdf]

Supplement table 1. Odds ratio (95% confidence interval) of metabolic syndrome in relation to different life stages and age group at famine exposure by the NCEP-ATPIII metabolic syndrome definition.

|                                      | Univariate      | Model1          | Model 2         | Model 3         |
|--------------------------------------|-----------------|-----------------|-----------------|-----------------|
| Non-exposed(1971-1975)               | 0.62(0.50-0.77) | 0.70(0.54-0.89) | 0.66(0.49-0.88) | 0.60(0.48-0.75) |
| Non-exposed(1968-1970)               | 0.69(0.57-0.84) | 0.75(0.60-0.93) | 0.74(0.59-0.94) | 0.71(0.58-0.86) |
| Non-exposed(1965-1967)               | 0.72(0.59-0.88) | 0.75(0.61-0.92) | 0.76(0.62-0.94) | 0.74(0.60-0.91) |
| Non-exposed(1962-1964)               | 1(Ref)          | 1(Ref)          | 1(Ref)          | 1(Ref)          |
| Fetal-exposed(1959-1961)             | 1.20(0.98-1.47) | 1.15(0.94-1.42) | 1.19(0.96-1.48) | 1.23(1.00-1.51) |
| Childhood-exposed(1956-1958)         | 1.23(1.03-1.48) | 1.14(0.94-1.39) | 1.19(0.96-1.48) | 1.25(1.05-1.50) |
| Childhood-exposed(1954-1956)         | 1.53(1.28-1.83) | 1.36(1.09-1.69) | 1.44(1.12-1.86) | 1.56(1.30-1.88) |
| Childhood-exposed(1951-1953)         | 2.18(1.86-2.56) | 1.82(1.41-2.35) | 2.00(1.46-2.72) | 2.25(1.90-2.66) |
| Adolescence/Adult exposed(1931-1950) | 2.27(1.97-2.64) | 1.68(1.17-2.41) | 1.99(1.24-3.17) | 2.42(2.06-2.85) |

Model: Adjusted for age and sex.

Model 2: Adjusted for age, cohort, residential area, sex, education levels, income levels, current smoking and current drinking.

Model 3: Removed age from model 2.

Supplement table 2. Odds ratio (95% confidence interval) of metabolic syndrome in relation to different life stages and age group at famine exposure by the CDS metabolic syndrome definition.

|                                      | Univariate       | Model1          | Model 2         | Model 3         |
|--------------------------------------|------------------|-----------------|-----------------|-----------------|
| Non-exposed(1971-1975)               | 0.63(0.49-0.80)  | 0.74(0.56-0.97) | 0.66(0.62-0.78) | 0.71(0.52-0.97) |
| Non-exposed(1968-1970)               | 0.72(0.58-0.89)  | 0.74(0.56-0.97) | 0.75(0.58-0.97) | 0.80(0.62-1.03) |
| Non-exposed(1965-1967)               | 0.63(0.50-0.80)  | 0.67(0.53-0.85) | 0.65(0.51-0.83) | 0.68(0.53-0.86) |
| Non-exposed(1962-1964)               | 1(Ref)           | 1(Ref)          | 1(Ref)          |                 |
| Fetal-exposed(1959-1961)             | 1.23(0.98-1.54)  | 1.17(0.93-1.47) | 1.28(1.02-1.61) | 1.19(0.94-1.50) |
| Childhood-exposed(1956-1958)         | 1.28(1.05-1.55)  | 1.14(0.92-1.42) | 1.23(0.98-1.55) | 1.15(0.92-1.45) |
| Childhood-exposed(1954-1956)         | 1.51 (1.24-1.84) | 1.28(1.01-1.62) | 1.16(0.89-1.52) | 1.27(0.97-1.66) |
| Childhood-exposed(1951-1953)         | 2.23(1.88-2.65)  | 1.72(1.32-2.25) | 1.64(1.19-2.26) | 1.74(1.27-2.40) |
| Adolescence/Adult exposed(1931-1950) | 3.02(2.57-3.54)  | 1.97(1.35-2.87) | 1.79(1.11-2.89) | 2.05(1.27-3.30) |

Model: Adjusted for age and sex.

Model 2: Adjusted for age, cohort, residential area, sex, education levels, income levels, current smoking and current drinking.

Model 3: Removed age from model 2.

Supplement table 3. Odds ratio (95% confidence interval) of metabolic syndrome in relation to different life stages and age group at famine exposure by the IDF metabolic syndrome definition.

|                                      | Univariate      | Model1          | Model2          | Model 3         |
|--------------------------------------|-----------------|-----------------|-----------------|-----------------|
| Non-exposed(1971-1975)               | 0.62(0.49-0.78) | 0.72(0.55-0.93) | 0.61(0.45-0.82) | 0.59(0.47-0.75) |
| Non-exposed(1968-1970)               | 0.71(0.58-0.87) | 0.79(0.63-0.98) | 0.72(0.57-0.92) | 0.71(0.57-0.87) |
| Non-exposed(1965-1967)               | 0.69(0.59-0.86) | 0.73(0.59-0.91) | 0.70(0.56-0.88) | 0.69(0.56-0.86) |
| Non-exposed(1962-1964)               | 1(Ref)          | 1(Ref)          | 1(Ref)          |                 |
| Fetal-exposed(1959-1961)             | 1.17(0.94-1.45) | 1.14(0.90-1.39) | 1.19(0.95-1.49) | 1.21(0.97-1.50) |
| Childhood-exposed(1956-1958)         | 1.19(0.97-1.43) | 1.08(0.88-1.32) | 1.17(0.94-1.47) | 1.20(0.99-1.45) |
| Childhood-exposed(1954-1956)         | 1.44(1.20-1.74) | 1.24(0.99-1.56) | 1.39(1.07-1.81) | 1.44(1.19-1.74) |
| Childhood-exposed(1951-1953)         | 2.05(1.74-2.41) | 1.62(1.25-2.10) | 1.96(1.43-2.70) | 2.06(1.74-2.45) |
| Adolescence/Adult exposed(1931-1950) | 2.18(1.87-2.54) | 1.47(1.02-2.13) | 2.10(1.30-3.37) | 2.28(1.92-2.69) |

Model1 : Adjusted for age and sex.

Model 2: Adjusted for age, cohort, residential area, sex, education levels, income levels, current smoking and current drinking.

Model 3: Removed age from model 2.

Supplement table 4.Odds ratio (95% confidence interval) of metabolic syndrome in relation to different life stages at famine exposure in urban and rural areas.

| Exposure stages           | Prevalence of metabolic syndrome (%) | Urban areas     | Prevalence of metabolic syndrome (%) | Rural areas     |
|---------------------------|--------------------------------------|-----------------|--------------------------------------|-----------------|
| <b>ATP III criteria</b>   |                                      |                 |                                      |                 |
| Non-exposed               | 27.8                                 | 1.00(Ref)       | 24.2                                 | 1.00(Ref)       |
| Fetal-exposed             | 37.3                                 | 1.17(0.86-1.59) | 32.0                                 | 1.25(0.95-1.63) |
| Childhood-exposed         | 46.2                                 | 1.26(0.94-1.70) | 37.3                                 | 1.42(1.10-1.84) |
| Adolescence/adult exposed | 61.3                                 | 1.27(0.77-2.11) | 41.7                                 | 1.33(0.86-2.04) |
| <b>CDS criteria</b>       |                                      |                 |                                      |                 |
| Non-exposed               | 19.0                                 | 1.00(Ref)       | 17.3                                 | 1.00(Ref)       |
| Fetal-exposed             | 26.2                                 | 1.09(0.78-1.52) | 25.4                                 | 1.37(1.03-1.82) |
| Childhood-exposed         | 34.4                                 | 1.18(0.88-1.58) | 28.7                                 | 1.40(1.09-1.79) |
| Adolescence/adult exposed | 55.1                                 | 1.40(0.87-2.26) | 38.3                                 | 1.58(1.04-2.40) |
| <b>IDF criteria</b>       |                                      |                 |                                      |                 |
| Non-exposed               | 22.7                                 | 1.00(Ref)       | 21.4                                 | 1.00(Ref)       |
| Fetal-exposed             | 31.2                                 | 1.23(0.89-1.70) | 28.5                                 | 1.27(0.96-1.68) |
| Childhood-exposed         | 36.9                                 | 1.18(0.86-1.60) | 34.2                                 | 1.52(1.17-1.98) |
| Adolescence/adult exposed | 51.6                                 | 1.23(0.74-2.06) | 37.8                                 | 1.45(0.93-2.26) |

Adjusted for age, cohort, sex, education levels, income levels, current smoking and current drinking.
